# Supplementary material for: Meso–macroporous organic polymer-supported homogeneously dispersed small Pd nanoparticles obtained by a simple ion-exchange approach for the Heck reaction
Source: Royal Society of Chemistry journal article supplement (doi:10.1039/c9nj03344k), 2019-01-01
Supplement: c9nj03344k1.pdf [file c9nj03344k1.pdf]

# Supporting information

## **Meso-Macroporous Organic Polymer Supported Homogeneously Dispersed Small Pd Nanoparticles by a Simple Ion-Exchange Approach for Heck Reaction**

Shunmin Ding,<sup>1\*</sup> Baihong Qu,<sup>1</sup> Yuan Li,<sup>1</sup> Ling Sun,<sup>1</sup> Shaohua Wu,<sup>1</sup> Rong Zeng,<sup>2\*</sup>  
Mengmeng Xu,<sup>1</sup> Chao Chen<sup>1\*</sup> and Ning Zhang<sup>1</sup>

1. Key Laboratory of Jiangxi Province For Environment and Energy Catalysis, College of Chemistry, Nanchang University, Nanchang, P.R. China. 330031. dingshunmin2007@163.com (S. Ding) and chaochen@ncu.edu.cn (C. Chen)
2. Jiangxi Province Key Laboratory of Polymer Micro/Nano Manufacturing and Devices, School of Chemistry, Biology and Materials Science, East China University of Technology, Nanchang, P.R. China. 330013. zengrongnc@163.com (R. Zeng)

## Experimental Section

### 2.1 Chemicals

Triethylamine ( $\geq 99.0\%$ , 500 mL), ethyl acetate ( $\geq 99.5\%$ , AR, 500 mL), DMF ( $\geq 99.5\%$ , AR, 500 mL), anhydrous ethanol ( $\geq 99.7\%$ , AR, 500 mL), divinylbenzene ( $\geq 98\%$ , 500 mL), 4-vinylpyridine (96%, 25 mL), iodobenzene ( $\geq 97.0\%$ , 100 g), 4-iodonitrobenzene (98%, 25 g), 4-iodotoluene (99%, 25 g), 4-iodoanisole (97%, 25 g), bromobenzene ( $\geq 99.5\%$ , 500 mL), 4-bromonitrobenzene (97%, 5 g), 4-bromotoluene (98%, 25g), 4-bromoanisole (98%, 50 mL), chlorobenzene ( $\geq 99.5\%$ , 500 mL), 4-chloronitrobenzene (99%, 100 g), 4-chlorotoluene (98%, 25 g), 4-chloroanisole (98%, 25 g), styrene ( $\geq 99.0\%$ , 500 mL) and ethyl acrylate ( $\geq 98.0\%$ , 500 mL) were purchased from Sinopharm Chemical Reagent Co., Ltd and used without further purification. Ultrapure water ( $\geq 18.2 \text{ M}\Omega \text{ cm}^{-1}$ ) was used in all experiments.

### 2.2 Synthesis of MOP

The meso-macroporous organic polymer (MOP) was synthesized by a reported method [22, 26] and the detail procedure was as follows: divinylbenzene (2 mL) and 4-vinylpyridine (1 mL) were added into a solution containing 0.07 g of AIBN and 30 mL of ethyl acetate. After stirring at room temperature for 3 h, the mixture was hydrothermally treated at 100 °C for 24 h, followed by slow evaporation of the solvents. The obtained sample was designated as MOP.

### 2.3 Characterization

Fourier transform infrared (FT-IR) spectra were recorded between 4000-400  $\text{cm}^{-1}$  on a Nicolet 5700 instrument. The powder X-ray diffraction (XRD) data were

operated on a XD-3 diffractometer with Cu K $\alpha$  radiation ( $\lambda = 0.15418$  nm, 40 kV/30 mA). The diffraction patterns were performed in the range of 10-80° with a step of 0.020 °/s. X-ray photoelectron spectroscopy (XPS) was performed on an ESCALAB250xi spectrometer (Thermon Scientific), all binding energies were calibrated by using the C1s peak at 284.8 eV as a reference. The nitrogen adsorption and desorption isotherms were measured at 77 K under a Micro ASAP 2020 instrument. Transmission electron microscopy (TEM) was taken on JEOL JEM-2100 at 300 kV. Palladium content of the catalyst was measured by inductively coupled plasma (ICP) on PE5300DV analyzer.

#### **2.4. Typical procedure for Heck reaction**

Iodobenzene (1.02 g, 5 mmol), styrene (0.78 g, 7.5 mmol), NEt<sub>3</sub> (15 mmol), DMF (10 mL), n-dodecane (0.5 mL, internal standard) and Pd-catalyst (0.0174 mol% Pd respect to iodobenzene) were added into a reaction tube equipped with a magnetic stir bar under atmospheric condition. The resulting mixture was then stirred at 90 °C for a specialized time. The yield of the products was determined by GC and GC-MS.

The catalyst leaching experiments was carried out by stirring the same mixture above at 90 °C. After 2 hour, Pd/MOP-I was filtered from the hot reaction mixture. Then the filtrate was continued for 5 hours at the same condition. The reaction cycles were performed using Pd/MOP-I catalyst (100 mg) in the Heck reaction of iodobenzene (50 mmol) and styrene (75 mmol) at 90 °C for 6 h. After each cycle the catalyst was separated, washed with DI-water and ethanol 3 times respectively, and dried at 60 °C under vacuum overnight. Fresh reactants and solvent were then charged to the glass-reactor together with the recovered catalyst to carry out the next run reaction.

The kinetic profiles of the consecutive runs were performed as follows: Iodobenzene (10.2 g, 50 mmol), styrene (7.8 g, 75 mmol), NEt<sub>3</sub> (150 mmol), DMF (100 mL), n-dodecane (5 mL, internal standard) and Pd-catalyst (0.0174 mol% Pd respect to iodobenzene, 100 mg) were added into a reaction tube equipped with a

magnetic stir bar under atmospheric condition. An aliquot (50 uL) was removed every 2 hour and diluted with diethyl ether. GC analysis (1 uL autoinjection) indicated that the maximum yield of product was reached within 8 h. After each cycle the catalyst was separated, washed with DI-water and ethanol 3 times respectively, and dried at 60 °C under vacuum overnight. Fresh reactants and solvent were then charged to the glass-reactor together with the recovered catalyst to carry out the next run reaction.

## Tables

**Table S1.** Textural properties of MOP, MOP-I and Pd/MOP-I

| Sample          | S <sub>BET</sub><br>(m <sup>2</sup> g <sup>-1</sup> ) | Pore volume<br>(cm <sup>3</sup> g <sup>-1</sup> ) | Pd loading (wt %)<br>/ ICP |
|-----------------|-------------------------------------------------------|---------------------------------------------------|----------------------------|
| <b>MOP</b>      | 486                                                   | 0.414                                             | -                          |
| <b>MOP-I</b>    | 132                                                   | 0.300                                             | -                          |
| <b>Pd/MOP-I</b> | 115                                                   | 0.284                                             | 1.70                       |

**Table S2.** The summary of supported Pd nanoparticles catalysts for Heck Reaction for iodobenzene with styrene

| Sample                                   | Particle size of Pd NPs (nm) | Pore size (nm) | BET (m <sup>2</sup> /g) | T (°C) | t(h) | Yield (%) | TON <sup>a</sup> | TOF (h <sup>-1</sup> ) <sup>b</sup> | Ref.      |
|------------------------------------------|------------------------------|----------------|-------------------------|--------|------|-----------|------------------|-------------------------------------|-----------|
| Pd/SiO <sub>2</sub>                      | 7                            |                |                         | 135    | 4    | 88        | 629              | 157.25                              | 7         |
| Pd/CNCs                                  | 4.8                          | -              | -                       | 40     | 3    | 99        | 70               | 23.33                               | 8         |
| Pd/RGO-IL                                | 7                            | 2              |                         | 130    | 6    | 92        | 244              | 40.67                               | 9         |
| Pd/MOF-3                                 | 2.8                          | -              | -                       | 80     | 24   | 98        | 163              | 6.8                                 | 10        |
| Pd/ZIF-67-50                             | 6                            | -              | -                       | 120    | 6    | 78        | 867              | 144.5                               | 11        |
| Pd/ZnFe <sub>2</sub> O <sub>4</sub>      | -                            | 24.1           | 75                      | 120    | 12   | 65        | 542              | 90.3                                | 12        |
| Pd/NHC-MOP                               | 3-5                          | 0.7-1.3        | 610                     | 130    | 1    | 99        | 99               | 99                                  | 13        |
| Pd/PS-IL(Cl)                             | 4-6                          | -              | -                       | 100    | 6    | 42        | 210              | 35                                  | 14        |
| PdNPs/ZIF-8                              | 3-5                          |                | 197                     | 95     | 0.5  | 85        | 0.85             | 1.7                                 | S1        |
| Pd/ZPGly                                 | 10                           | -              | -                       | 120    | 3    | 82        | 860              | 286.67                              | S2        |
| Pd/pAT                                   | 2-5                          | -              | -                       | 100    | 8    | 90        | 1200             | 150                                 | S3        |
| PdNPs@NHC@ZIF-8                          | Ultra small                  | 2.1            | 758                     | 110    | 0.75 | 94        | 1250             | 1666.67                             | S4        |
| Pd/Nano-sized SiO <sub>2</sub> -g-PAAm   | -                            | -              | -                       | 85     | 30   | 100       | 10000            | 333.33                              | S5        |
| Pd-imine@MNPs/Cs                         | 20.5                         | -              | -                       | -      | -    | 75        | -                | 5.7 × 10 <sup>4</sup>               | S6        |
| Pd(0)/met/GO                             | 14                           | -              | -                       | 110    | 1    | 96        | 960              | 960                                 | S7        |
| PdcNPs/ C@Fe <sub>3</sub> O <sub>4</sub> | 10-15                        | -              | -                       | 100    | 12   | 99        | 135              | 11.25                               | S8        |
| Pd@PANI                                  | 2                            | -              | -                       | 100    | 0.5  | 88        | 1466.67          | 2933.33                             | S9        |
| Pd/CNCs                                  | 4.8                          | -              | -                       | 40     | 5    | 92.5      | 65.5             | 13.1                                | S10       |
| Pd/MOP-I                                 | 2.4±0.2                      | 30-90          | 115                     | 90     | 6    | 97.3      | 5560             | 926.67                              | This work |

<sup>a</sup> TON = Molars of product / Molars of catalyst

<sup>b</sup> TOF(h<sup>-1</sup>) = TON/Reaction time (hours)

**Table S3.** ICP-OES results of all recycle runs for Pd/MOP-I and filtrate solution

| Sample | Pd loading of Pd/MOP-I (wt %) | Pd content of filtrate solution (ppm) |
|--------|-------------------------------|---------------------------------------|
| 1st    | 1.70                          | <0.1                                  |
| 2nd    | 1.72                          | <0.1                                  |
| 3rd    | 1.69                          | <0.1                                  |
| 4th    | 1.69                          | <0.1                                  |

## Figures

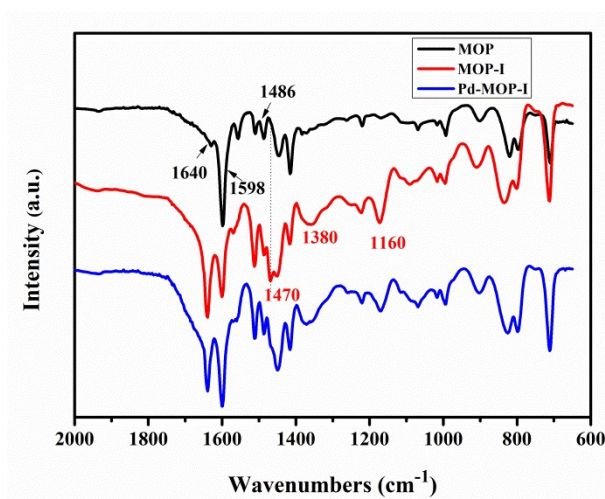

**Fig. S1.** FT-IR spectra of MOP, MOP-I and Pd/MOP-I

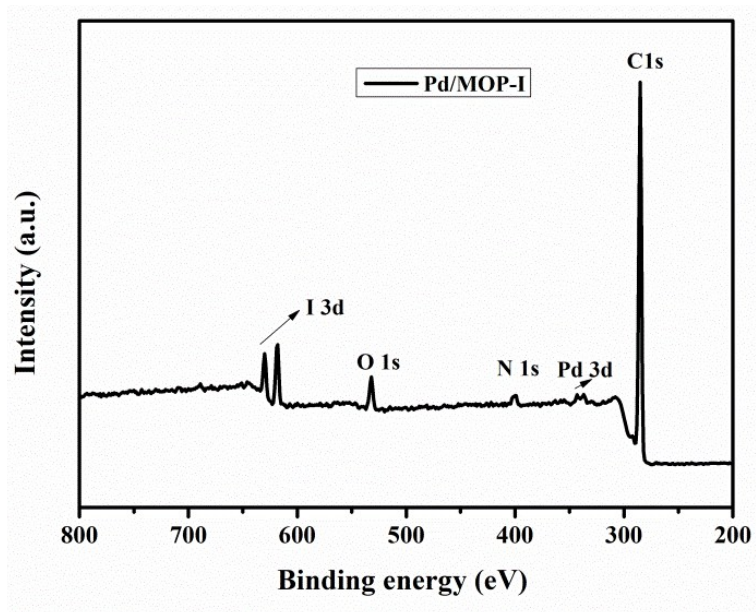

**Fig. S2.** The survey XPS spectra of Pd/MOP-I

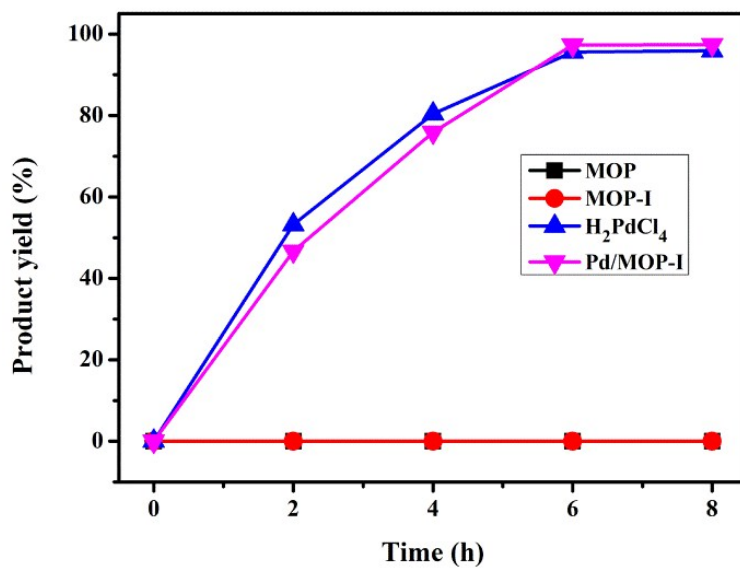

**Fig. S3.** The Heck reaction of iodobenzene with styrene catalyzed by Pd/MOP-I and control samples.

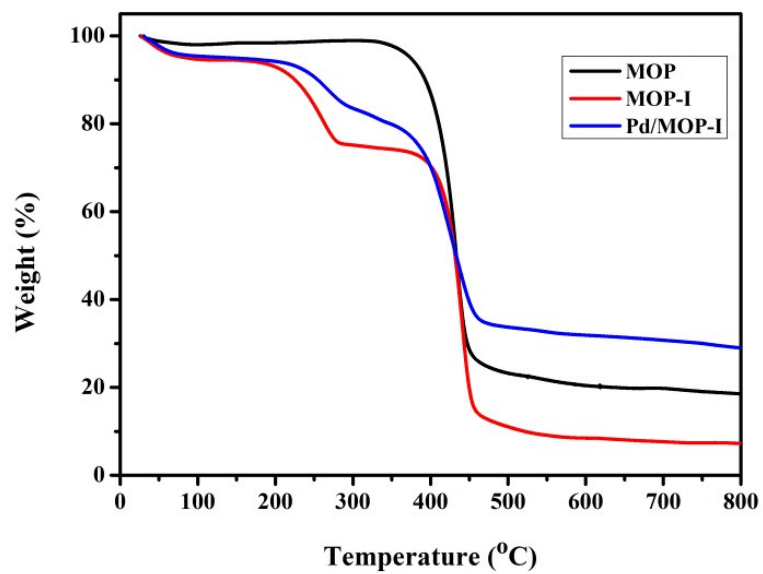

**Fig. S4.** TG analysis curves of MOP, MOP-I and Pd/MOP-I.

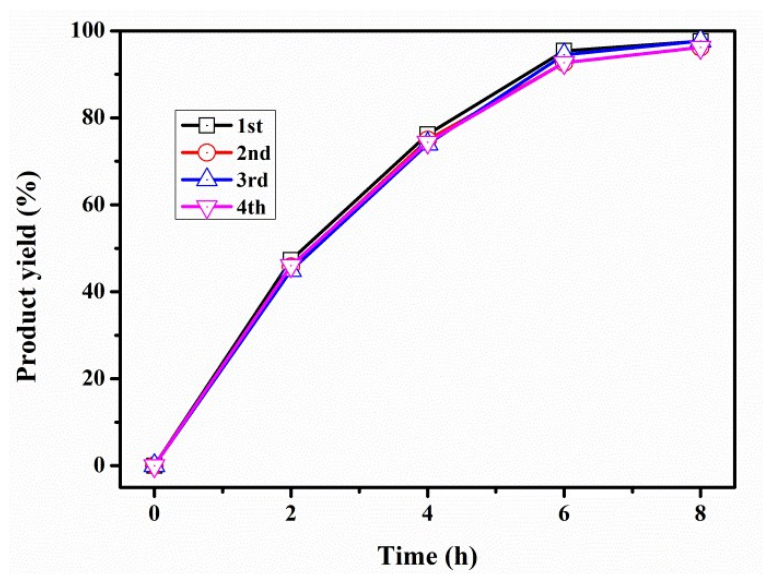

**Fig. S5.** The kinetic profiles of the consecutive runs of Pd/MOP-I.



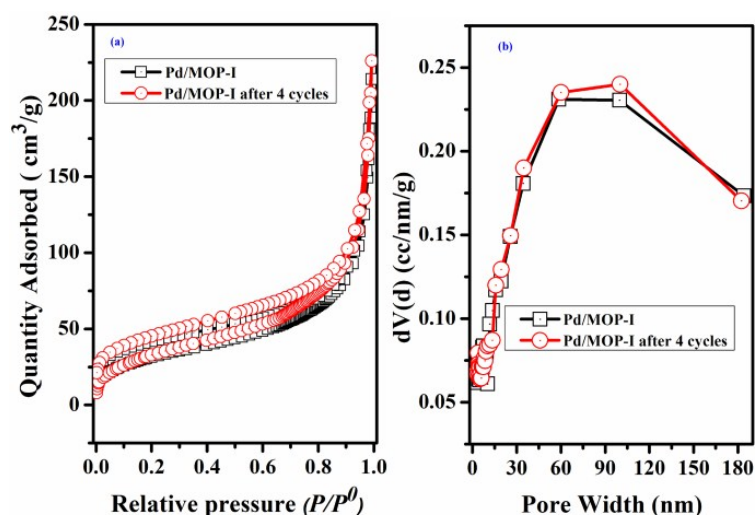

**Fig. S6.** N<sub>2</sub> adsorption-desorption isotherms and pore size distributions of fresh Pd/MOP-I and after 4 recycles

## Reference

- [S1] M. N. Shaikh, M. A. Aziz, A. Helal, A. N. Kalanthoden, Z. H. Yamani, *ChemistrySelect*, 2017, **2**, 9052.
- [S2] V. Kozell, T. Giannoni, M. Nocchetti, R. Vivani, O. Piermatti, L. Vaccaro, *Catalysts*, 2017, **7**, 186.
- [S3] A. Taher, M. Choudhary, D. Nandi, S. Siwal, K. Mallick, *Appl. Organomet. Chem.*, 2018, **32**, e3898.
- [S4] M. Azad, S. Rostamizadeh, H. Estiri, F. Nouri, *Appl. Organomet. Chem.*, 2019, **33**, e4952.
- [S5] S. Ghasemi, S. Karim, *Colloid. Polym. Sci.* 2018, **296**, 1323.
- [S6] A. R. Hajipour, A. R. Sadeghi, Z. Khorsandi, *Appl. Organomet. Chem.*, 2018, **32**, e4112.
- [S7] H. Veisi, N. Mirzaee, *Appl. Organomet. Chem.*, 2018, **32**, e4067.
- [S8] B.S. Kumar, R. Anbarasan, A. J. Amali, K. Pitchumani, *Tetrahedron Lett.*, 2017, **58**, 3276.
- [S9] L. Yu, Y. Huang, Z. Wei, Y. Ding, C. Su, Q. Xu, *J. Org. Chem.*, 2015, **80**, 8677.
- [S10] X. Guo, C. Hao, C. Wang, S. Sarina, X. Guo, X. Guo, *Catal. Sci. Techn.*, 2016, **6**, 7738.
